# Supplementary material
Source: PubMed Central journal article supplement (PMC2726416)
Supplement: 0902431106_ST1_PDF.pdf [file 0902431106_ST1_PDF.pdf]

**Table S1. Distribution of NAB homologs among sequenced bacteria and archaea**NCBI accession numbers for NAB-1 and NAB-2 homologs are color coded according to Fig. 3A predictions, **Neu; Leg; Psc; 'animal-like'**.

Strains are in alphabetical order with NAB-negative genomes enclosed by double lines below each NCBI class of NAB-positive genomes.

| <b>ε-Proteobacteria</b>                                     | <b>NAB-1</b>                                   |                  |                  | <b>NAB-2</b>     |                  |                  |
|-------------------------------------------------------------|------------------------------------------------|------------------|------------------|------------------|------------------|------------------|
| <i>Arcobacter butzleri</i> RM4018                           | YP_001491128                                   |                  |                  | YP_001491129     |                  |                  |
| <i>Caminibacter mediatlanticus</i> TB-2                     | ZP_0187175<br>2                                | ZP_01872215      |                  | ZP_0187175<br>7  | ZP_01872218      |                  |
| <i>Campylobacter coli</i> RM2228                            | ZP_0036736<br>5                                | ZP_0036738<br>1  | ZP_003680<br>95  | ZP_0036737<br>1  | ZP_00367377      |                  |
| <i>Campylobacter concisus</i> 13826                         | YP_001467628                                   |                  |                  | YP_001467632     |                  |                  |
| <i>Campylobacter curvus</i> 525.92                          | YP_001408965                                   |                  |                  | YP_001408968     |                  |                  |
| <i>Campylobacter fetus</i> subsp. <i>fetus</i> 82-40        | YP_892682                                      |                  |                  | YP_892689        |                  |                  |
| <i>Campylobacter jejuni</i> RM1221                          | YP_179491                                      | YP_179505        |                  | YP_179497        | YP_179501        |                  |
| <i>Campylobacter jejuni</i> subsp. <i>doylei</i> 269.97     | YP_0013976<br>04                               | YP_0013975<br>84 | YP_001397<br>865 | YP_0013975<br>96 | YP_001397590     |                  |
| <i>Campylobacter jejuni</i> subsp. <i>jejuni</i> 260.94     | ZP_0106903<br>2                                | ZP_01069114      |                  | ZP_01068970      | ZP_01069267      |                  |
| <i>Campylobacter jejuni</i> subsp. <i>jejuni</i> 81116      | YP_001482908                                   |                  |                  | YP_001482827     | YP_00148291<br>4 |                  |
| <i>Campylobacter jejuni</i> subsp. <i>jejuni</i> 81-176     | YP_0010009<br>86                               | ZP_0227165<br>0  | YP_001000<br>821 | YP_0010009<br>92 | ZP_0227148<br>8  | YP_00100081<br>8 |
| <i>Campylobacter jejuni</i> subsp. <i>jejuni</i> 84-25      | ZP_0109932<br>5                                | ZP_0109976<br>7  | ZP_010997<br>42  | ZP_0109931<br>1  | ZP_0109929<br>9  | ZP_01099657      |
| <i>Campylobacter jejuni</i> subsp. <i>jejuni</i> CF93-6     | ZP_0106824<br>9                                | ZP_0106828<br>0  | ZP_010685<br>49  | ZP_0106826<br>0  | ZP_0106822<br>4  | ZP_01068514      |
| <i>Campylobacter jejuni</i> subsp. <i>jejuni</i> CG8486     | ZP_0181069<br>4                                | ZP_01810708      |                  | ZP_0181070<br>0  | ZP_0181070<br>4  | ZP_01809838      |
| <i>Campylobacter jejuni</i> subsp. <i>jejuni</i> HB93-13    | ZP_01070901                                    |                  | ZP_010708<br>36  | ZP_01070873      |                  | ZP_01071011      |
| <i>Campylobacter jejuni</i> subsp. <i>jejuni</i> NCTC 11168 | NP_282457                                      | NP_282477        | NP_282291        | NP_282463        | NP_282473        | NP_282289        |
| <i>Campylobacter lari</i> RM2100                            | ZP_0036943<br>0                                | ZP_00369519      |                  | ZP_0036865<br>0  | ZP_00369513      |                  |
| <i>Campylobacter upsaliensis</i> RM3195                     | ZP_0037176<br>4                                | ZP_0037149<br>5  | ZP_003711<br>44  | ZP_0037033<br>5  | ZP_00371499      |                  |
| <i>Helicobacter acinonychis</i> str. <i>Sheeba</i>          | YP_665018                                      | YP_664764        |                  | YP_664200        |                  | YP_665020        |
| <i>Helicobacter hepaticus</i> ATCC 51449                    | NP_860431                                      |                  |                  | NP_860439        |                  |                  |
| <i>Helicobacter pylori</i> 26695                            | NP_207124                                      |                  |                  | NP_206977        |                  |                  |
| <i>Helicobacter pylori</i> HPAG1                            | YP_627070                                      |                  |                  | YP_626916        |                  |                  |
| <i>Helicobacter pylori</i> J99                              |                                                |                  |                  | NP_222887        |                  |                  |
| <i>Sulfurimonas denitrificans</i> DSM 1251                  | YP_393113                                      |                  |                  |                  | YP_393109        |                  |
| <i>Wolinella succinogenes</i> DSM 1740                      | NP_908204                                      |                  |                  | NP_908207        |                  |                  |
| <i>Campylobacter hominis</i> ATCC BAA-381                   | <i>Sulfurovum</i> sp. NBC37-1                  |                  |                  |                  |                  |                  |
| <i>Nitratiruptor</i> sp. SB155-2                            | <i>Thiomicrospira denitrificans</i> ATCC 33889 |                  |                  |                  |                  |                  |
| <b>Bacteroidetes</b>                                        | <b>NAB-1</b>                                   |                  |                  | <b>NAB-2</b>     |                  |                  |
| <i>Algoriphagus</i> sp. PR1                                 | ZP_01717386                                    |                  |                  | ZP_01717383      |                  |                  |
| <i>Bacteroides capillosus</i> ATCC 29799                    | ZP_02036000                                    |                  |                  |                  |                  |                  |
| <i>Bacteroides fragilis</i> NCTC 9343                       | YP_211444                                      |                  |                  |                  |                  |                  |
| <i>Bacteroides fragilis</i> YCH46                           | YP_101321                                      | YP_099504        | YP_099012        |                  |                  |                  |
| <i>Bacteroides ovatus</i> ATCC 8483                         | ZP_02066715                                    |                  |                  |                  |                  |                  |
| <i>Bacteroides thetaiotaomicron</i> VPI-5482                | NP_810626.1                                    |                  |                  | NP_810627        |                  |                  |
| <i>Bacteroides uniformis</i> ATCC 8492                      | ZP_0207081<br>2                                | ZP_0207154<br>6  | ZP_020719<br>64  | ZP_0207154<br>2  | ZP_02070811      |                  |
| <i>Bacteroides vulgatus</i> ATCC 8482                       | YP_0013012<br>63                               | YP_0013012<br>61 | YP_001299<br>934 | YP_001301264     |                  |                  |
| <i>Cellulophaga</i> sp. MED134                              | ZP_0105150<br>3                                | ZP_01049060      |                  | ZP_01051504      |                  |                  |
| <i>Chlorobium chlorochromatii</i> CaD3                      | YP_379437                                      | YP_378636        |                  | YP_379377        |                  |                  |

|                                                                            |                                             |                 |                                          |                  |                  |
|----------------------------------------------------------------------------|---------------------------------------------|-----------------|------------------------------------------|------------------|------------------|
| <i>chlorobium ferrooxidans</i> DSM 13031                                   | ZP_0138574<br>1                             | ZP_0138546<br>1 | ZP_013852<br>31                          | ZP_01385460      | ZP_01385672      |
| <i>Chlorobium limicola</i> DSM 245                                         | ZP_0051141<br>2                             | ZP_00513057     |                                          |                  | ZP_00512609      |
| <i>Chlorobium phaeobacteroides</i> DSM 266                                 | YP_911960                                   | YP_912515       |                                          |                  | YP_911647        |
| <i>Chlorobium tepidum</i> TLS                                              | NP_662044                                   | NP_662709       |                                          |                  | NP_661719        |
| <i>Croceibacter atlanticus</i> HTCC2559                                    | ZP_0095041<br>0                             | ZP_0095126<br>3 | ZP_00950767                              | ZP_00950411      |                  |
| <i>Cytophaga hutchinsonii</i> ATCC 33406                                   | YP_679353                                   |                 |                                          | YP_679350        |                  |
| <i>Flavobacteria bacterium</i> BAL38                                       | ZP_0173318<br>6                             | ZP_01735244     |                                          | ZP_01733184      |                  |
| <i>Flavobacteria bacterium</i> BBFL7                                       | ZP_0120289<br>6                             | ZP_0120192<br>1 | ZP_012030<br>49                          | ZP_0120289<br>9  | ZP_01201920      |
| <i>Flavobacteriales bacterium</i> HTCC2170                                 | ZP_0110568<br>7                             | ZP_01106328     |                                          | ZP_01105691      |                  |
| <i>Flavobacterium johnsoniae</i> UW101                                     | YP_0011926<br>62                            | YP_001196831    |                                          | YP_001192660     |                  |
| <i>Flavobacterium psychrophilum</i> JIP02/86                               | YP_0012961<br>51                            | YP_001295888    |                                          | YP_001296150     |                  |
| <i>Flavobacterium</i> sp. MED217                                           | ZP_0105892<br>9                             | ZP_01061526     |                                          | ZP_01058928      |                  |
| <i>Gramella forsetii</i> KT0803                                            | YP_860622                                   | YP_862055       | YP_861860                                | YP_860619        |                  |
| <i>Pedobacter</i> sp. BAL39                                                | ZP_01883717                                 |                 |                                          | ZP_01883719      |                  |
| <i>Pelodictyon luteolum</i> DSM 273                                        | YP_374880                                   |                 |                                          |                  | YP_375179        |
| <i>Pelodictyon phaeoclathratiforme</i> BU-1                                | ZP_0059063<br>7                             | ZP_0058816<br>7 | ZP_005882<br>67                          | ZP_0058827<br>4  | ZP_0171738<br>3  |
| <i>Polaribacter irgensii</i> 23-P                                          | ZP_01118271                                 |                 |                                          |                  |                  |
| <i>Prosthecochloris aestuarii</i> DSM 271                                  | ZP_0059235<br>5                             | ZP_00590933     |                                          |                  | ZP_00591854      |
| <i>Prosthecochloris vibrioformis</i> DSM 265                               | YP_0011304<br>43                            | YP_001129928    |                                          |                  | YP_00113054<br>1 |
| <i>Psychroflexus torquis</i> ATCC 700755                                   | ZP_0125435<br>8                             | ZP_01253608     |                                          |                  |                  |
| <i>Robiginitalea biformata</i> HTCC2501                                    | ZP_01120753                                 |                 |                                          |                  |                  |
| <i>Salinibacter ruber</i> DSM 13855                                        | YP_444751                                   |                 |                                          | YP_444748        |                  |
| <i>Tenacibaculum</i> sp. MED152                                            | ZP_0105275<br>4                             | ZP_01052336     |                                          | ZP_01052757      |                  |
| <i>unidentified eubacterium</i> SCB49                                      | ZP_0188975<br>2                             | ZP_01890888     |                                          |                  |                  |
| <i>Bacteroides caccae</i> ATCC 43185                                       | <i>Chlorobium phaeobacteroides</i> BS1      |                 | <i>Parabacteroides merdae</i> ATCC 43184 |                  |                  |
| <i>Candidatus Sulcia muelleri</i> str. Hc ( <i>Homalodisca coagulata</i> ) | <i>Parabacteroides distasonis</i> ATCC 8503 |                 | <i>Porphyromonas gingivalis</i> W83      |                  |                  |
| <b>Cyanobacteria</b>                                                       | <b>NAB-1</b>                                |                 | <b>NAB-2</b>                             |                  |                  |
| <i>Acaryochloris marina</i> MBIC11017                                      | YP_001516521                                |                 |                                          |                  |                  |
| <i>Anabaena variabilis</i> ATCC 29413                                      | YP_323517                                   | YP_323463       |                                          |                  |                  |
| <i>Crocospaera watsonii</i> WH 8501                                        | ZP_00517669                                 |                 |                                          | ZP_00514892      |                  |
| <i>Cyanothece</i> sp. CCY0110-                                             | ZP_01729244                                 |                 |                                          | ZP_01731448      |                  |
| <i>Gloeobacter violaceus</i> PCC 7421                                      | NP_926721                                   |                 |                                          |                  |                  |
| <i>Lyngbya</i> sp. PCC 8106                                                | ZP_0162232<br>9                             | ZP_01622482     |                                          |                  |                  |
| <i>Nodularia spumigena</i> CCY9414                                         | ZP_0163100<br>2                             | ZP_01631569     |                                          | ZP_01632274      |                  |
| <i>Nostoc punctiforme</i> PCC 73102                                        | ZP_0010827<br>2                             | ZP_00110422     |                                          | ZP_00109033      |                  |
| <i>Nostoc</i> sp. PCC 7120                                                 | NP_485331                                   | NP_485019       |                                          |                  |                  |
| <i>Prochlorococcus marinus</i> str. AS9601                                 | YP_001009733                                |                 |                                          | YP_001009815     |                  |
| <i>Prochlorococcus marinus</i> str. MIT 9211                               | YP_0015511<br>27                            | YP_001551172    |                                          | YP_001551130     |                  |
| <i>Prochlorococcus marinus</i> str. MIT 9215                               | YP_0014846<br>62                            | YP_001484645    |                                          | YP_0014846<br>80 | YP_001484665     |
| <i>Prochlorococcus marinus</i> str. MIT 9301                               | YP_0010916<br>37                            | YP_001091645    |                                          | YP_001091632     |                  |
| <i>Prochlorococcus marinus</i> str. MIT 9303                               | YP_001016135                                |                 |                                          | YP_001016130     |                  |

|                                                                 |                                                          |             |                                           |             |
|-----------------------------------------------------------------|----------------------------------------------------------|-------------|-------------------------------------------|-------------|
| <i>Prochlorococcus marinus</i> str. MIT 9312                    | YP_397845                                                | YP_397837   | YP_397842                                 | YP_397836   |
| <i>Prochlorococcus marinus</i> str. MIT 9313                    | NP_893935                                                |             | NP_893939                                 |             |
| <i>Prochlorococcus marinus</i> str. NATL1A                      | YP_001014697                                             |             | YP_001014695                              |             |
| <i>Synechococcus elongatus</i> PCC 7942                         | YP_401307                                                |             |                                           |             |
| <i>Synechococcus</i> sp. BL107                                  | ZP_01468600                                              | ZP_01468925 | ZP_01469027                               | ZP_01468604 |
| <i>Synechococcus</i> sp. CC9311                                 | YP_729407                                                | YP_729419   | YP_729411                                 | YP_729418   |
| <i>Synechococcus</i> sp. CC9605                                 | YP_382511                                                |             | YP_382515                                 |             |
| <i>Synechococcus</i> sp. CC9902-                                | YP_376474                                                | YP_376118   | YP_376470                                 | YP_376102   |
| <i>Synechococcus</i> sp. RS9916                                 | ZP_01471749                                              |             | ZP_01471755                               |             |
| <i>Synechococcus</i> sp. RS9917                                 | ZP_01078981                                              |             | ZP_01078980                               |             |
| <i>Synechococcus</i> sp. WH 8102-                               | NP_896493                                                | NP_896539   | NP_896543                                 | NP_896489   |
| <i>Synechocystis</i> sp. PCC 6803                               | NP_441379                                                |             | NP_441367                                 |             |
| <i>Trichodesmium erythraeum</i> IMS101                          | YP_723938                                                |             | YP_723990                                 |             |
| <i>Leptolyngbya valderiana</i> BDU 20041                        | <i>Synechococcus elongatus</i> PCC 6301                  |             | <i>Synechococcus</i> sp. WH 5701          |             |
| <i>Prochlorococcus marinus</i> str. NATL2A                      | <i>Synechococcus</i> sp. JA-2-3B'a(2-13)                 |             | <i>Synechococcus</i> sp. WH 7803          |             |
| <i>Prochlorococcus marinus</i> ss. <i>marinus</i> CCMP1375      | <i>Synechococcus</i> sp. JA-3-3Ab                        |             | <i>Synechococcus</i> sp. WH 7805          |             |
| <i>Prochlorococcus marinus</i> ss. <i>pastoris</i> CCMP1986     | <i>Synechococcus</i> sp. RCC307                          |             | <i>Thermosynechococcus elongatus</i> BP-1 |             |
| <b>δ-Proteobacteria</b>                                         | <b>NAB-1</b>                                             |             | <b>NAB-2</b>                              |             |
| <i>Bdellovibrio bacteriovorus</i> HD100                         | NP_968563                                                |             | NP_968560                                 |             |
| <i>delta proteobacterium</i> MLMS-1                             | ZP_01287684                                              |             | ZP_01288484                               |             |
| <i>Desulfovibrio desulfuricans</i> G20                          | YP_389746                                                |             | YP_389745                                 | YP_390169   |
| <i>Desulfovibrio vulgaris</i> subsp. <i>vulgaris</i> DP4        | YP_968030                                                |             | YP_968032                                 | YP_968074   |
| <i>Desulfovibrio vulgaris</i> ss. <i>vulgaris</i> Hildenborough |                                                          |             | YP_009573                                 | YP_012219   |
| <i>Desulfuromonas acetoxidans</i> DSM 684                       | ZP_01312106                                              | YP_386919   | ZP_01312107                               | ZP_01311516 |
| <i>Geobacter bemidjensis</i> Bem                                |                                                          |             | ZP_01773432                               |             |
| <i>Geobacter lovleyi</i> SZ                                     | YP_001951964                                             |             |                                           |             |
| <i>Geobacter metallireducens</i> GS-15                          | YP_384236                                                |             | YP_383423                                 |             |
| <i>Geobacter sulfurreducens</i> PCA                             | NP_953021                                                |             | NP_953019                                 |             |
| <i>Geobacter uraniireducens</i> Rf4                             | YP_001232805                                             |             | YP_001232802                              |             |
| <i>Lawsonia intracellularis</i> PHE/MN1-00                      | YP_595364                                                |             |                                           | YP_965814   |
| <i>Myxococcus xanthus</i> DK 1622                               | YP_629360                                                |             |                                           |             |
| <i>Pelobacter carbinolicus</i> DSM 2380                         | YP_356697                                                |             | YP_356696                                 | YP_356559   |
| <i>Syntrophus aciditrophicus</i> SB                             | YP_463211                                                |             |                                           |             |
| <i>Anaeromyxobacter dehalogenans</i> 2CP-C                      | <i>Desulfotalea psychrophila</i> LSv54                   |             | <i>Plesiocystis pacifica</i> SIR-1        |             |
| <i>Anaeromyxobacter</i> sp. Fw109-5                             | <i>Desulfovibrio vulgaris</i> subsp. <i>vulgaris</i> DP4 |             | <i>Stigmatella aurantiaca</i> DW4/3-1     |             |
| <i>Candidatus Desulfococcus oleovorans</i> Hxd3                 | <i>Pelobacter propionicus</i> DSM 2379                   |             | <i>Syntrophobacter fumaroxidans</i> MPOB  |             |
| <b>α-Proteobacteria</b>                                         | <b>NAB-1</b>                                             |             | <b>NAB-2</b>                              |             |
| <i>Bradyrhizobium japonicum</i> USDA 110                        | NP_772636                                                | NP_772612   | NP_772632                                 | NP_772611   |
| <i>Erythrobacter</i> sp. NAP1                                   | ZP_01040808                                              | ZP_01038973 | ZP_01040809                               | ZP_01038969 |
| <i>Fulvamarina pelagi</i> HTCC2506                              | ZP_01440484                                              |             | ZP_01440497                               |             |
| <i>Loktanella vestfoldensis</i> SKA53                           | ZP_01002614                                              |             | ZP_01002612                               |             |
| <i>Magnetospirillum magneticum</i> AMB-1                        | YP_419451                                                | YP_419454   | YP_419443                                 | YP_419455   |
| <i>Magnetospirillum magnetotacticum</i> MS-1                    | ZP_00056632.2                                            |             | ZP_00056630                               | ZP_00054178 |
| <i>Methylobacterium chloromethanicum</i> CM4                    | ZP_02059631                                              |             | ZP_02059639                               | YP_420076   |
| <i>Nitrobacter</i> sp. Nb-311A                                  | ZP_01045625                                              |             | ZP_01045622                               | ZP_01045506 |
| <i>Nitrobacter winogradskyi</i> Nb-255                          | YP_319003                                                |             | YP_319002                                 | YP_317265   |

|                                                                |                                                  |             |                                                                          |             |
|----------------------------------------------------------------|--------------------------------------------------|-------------|--------------------------------------------------------------------------|-------------|
| <i>Oceanicaulis alexandrii</i> HTCC2633                        | ZP_00952361                                      |             | ZP_00952353                                                              |             |
| <i>Paracoccus denitrificans</i> PD1222                         | YP_913900                                        | YP_917316   | YP_917322                                                                |             |
| <i>Rhodopseudomonas palustris</i> BisA53                       | YP_783144                                        |             | YP_783141                                                                |             |
| <i>Rhodopseudomonas palustris</i> HaA2                         | YP_485157                                        |             | YP_485155                                                                |             |
| <i>Roseobacter denitrificans</i> OCh 114                       | YP_684331                                        |             | YP_684329                                                                |             |
| <i>Roseobacter</i> sp. AzwK-3b                                 | ZP_0190153<br>2                                  | ZP_01901542 | ZP_0190153<br>6                                                          | ZP_01901525 |
| <i>Roseobacter</i> sp. CCS2                                    | ZP_01750795                                      |             | ZP_0174999<br>0                                                          | ZP_01750793 |
| <i>Roseobacter</i> sp. SK209-2-6                               | ZP_0175674<br>6                                  | ZP_01756754 | ZP_0175674<br>9                                                          | ZP_01756734 |
| <i>Sphingopyxis alaskensis</i> RB2256                          | YP_616624                                        | YP_616627   | YP_616622                                                                | YP_616626   |
| <i>Stappia aggregata</i> IAM 12614                             | ZP_0154547<br>7                                  | ZP_01550520 | ZP_01545475                                                              |             |
| <i>Sinorhizobium meliloti</i> 1021                             | <i>Methylobacterium extorquens</i> PA1           |             | <i>Rickettsia felis</i> URRWXCa12                                        |             |
| <i>Agrobacterium tumefaciens</i> str. C58                      | <i>Methylobacterium</i> sp. 4-46                 |             | <i>Rickettsia massiliae</i> MTU5                                         |             |
| <i>alpha proteobacterium</i> HTCC2255                          | <i>Neorickettsia sennetsu</i> str. Miyayama      |             | <i>Rickettsia prowazekii</i> str. Madrid E                               |             |
| <i>Anaplasma marginale</i> str. St. Maries                     | <i>Nitrobacter hamburgensis</i> X14              |             | <i>Rickettsia rickettsii</i> str. 'Sheila Smith'                         |             |
| <i>Anaplasma phagocytophilum</i> HZ                            | <i>Novosphingobium aromaticivorans</i> DSM 12444 |             | <i>Rickettsia sibirica</i> 246                                           |             |
| <i>Bartonella bacilliformis</i> KC583                          | <i>Oceanicola batsensis</i> HTCC2597             |             | <i>Rickettsia typhi</i> str. Wilmington                                  |             |
| <i>Bartonella henselae</i> str. Houston-1                      | <i>Oceanicola granulosus</i> HTCC2516            |             | <i>Roseobacter</i> sp. MED193                                            |             |
| <i>Bartonella quintana</i> str. Toulouse                       | <i>Ochrobactrum anthropi</i> ATCC 49188          |             | <i>Roseovarius nubinhbens</i> ISM                                        |             |
| <i>Brucella abortus</i> biovar 1 str. 9-941                    | <i>Orientia tsutsugamushi</i> Boryong            |             | <i>Roseovarius</i> sp. 217                                               |             |
| <i>Brucella melitensis</i> 16M                                 | <i>Parvibaculum lavamentivorans</i> DS-1         |             | <i>Roseovarius</i> sp. HTCC2601                                          |             |
| <i>Brucella melitensis</i> biovar Abortus 2308                 | <i>Parvularcula bermudensis</i> HTCC2503         |             | <i>Roseovarius</i> sp. TM1035                                            |             |
| <i>Brucella ovis</i> ATCC 25840                                | <i>Rhizobium etli</i> CFN 42                     |             | <i>Sagittula stellata</i> E-37                                           |             |
| <i>Brucella suis</i> 1330                                      | <i>Rhizobium leguminosarum</i> bv. viciae 3841   |             | <i>Silicibacter pomeroyi</i> DSS-3                                       |             |
| <i>Candidatus Pelagibacter ubique</i> HTCC1002                 | <i>Rhodobacter sphaeroides</i> 2.4.1             |             | <i>Silicibacter</i> sp. TM1040                                           |             |
| <i>Candidatus Pelagibacter ubique</i> HTCC1062                 | <i>Rhodobacter sphaeroides</i> ATCC 17025        |             | <i>Sinorhizobium medicae</i> WSM419                                      |             |
| <i>Caulobacter crescentus</i> CB15                             | <i>Rhodobacter sphaeroides</i> ATCC 17029        |             | <i>Sphingomonas</i> sp. SKA58                                            |             |
| <i>Caulobacter</i> sp. K31                                     | <i>Rhodobacteriales bacterium</i> HTCC2150       |             | <i>Sphingomonas wittichii</i> RW1                                        |             |
| <i>Ehrlichia canis</i> str. Jake                               | <i>Rhodobacteriales bacterium</i> HTCC2654       |             | <i>Sulfitobacter</i> sp. EE-36                                           |             |
| <i>Ehrlichia chaffeensis</i> str. Arkansas                     | <i>Rhodopseudomonas palustris</i> BisB18         |             | <i>Sulfitobacter</i> sp. NAS-14.1                                        |             |
| <i>Ehrlichia chaffeensis</i> str. Sapulpa                      | <i>Rhodopseudomonas palustris</i> BisB5          |             | <i>Wolbachia endosymbiont of Drosophila ananassae</i>                    |             |
| <i>Ehrlichia ruminantium</i> str. Gardel                       | <i>Rhodopseudomonas palustris</i> CGA009         |             | <i>Wolbachia endosymbiont of Drosophila melanogaster</i>                 |             |
| <i>Ehrlichia ruminantium</i> str. Welgevonden                  | <i>Rhodospirillum rubrum</i> ATCC 11170          |             | <i>Wolbachia endosymbiont of Drosophila simulans</i>                     |             |
| <i>Granulibacter bethesdensis</i> CGDNIH1                      | <i>Rickettsia africae</i> ESF-5                  |             | <i>Wolbachia endosymbiont of Drosophila willistoni</i> TSC#14030-0811.24 |             |
| <i>Hypomonas neptunium</i> ATCC 15444                          | <i>Rickettsia akari</i> str. Hartford            |             | <i>Wolbachia endosymbiont strain TRS of Brugia malayi</i>                |             |
| <i>Jannaschia</i> sp. CCS1                                     | <i>Rickettsia bellii</i> OSU 85-389              |             | <i>Xanthobacter autotrophicus</i> Py2                                    |             |
| <i>Maricaulis maris</i> MCS10                                  | <i>Rickettsia bellii</i> RML369-C                |             | <i>Zymomonas mobilis</i> subsp. <i>mobilis</i> ZM4                       |             |
| <i>Mesorhizobium loti</i> MAFF303099]                          | <i>Rickettsia canadensis</i> str. McKiel         |             |                                                                          |             |
| <i>Mesorhizobium</i> sp. BNCl                                  | <i>Rickettsia conorii</i> str. Malish 7          |             |                                                                          |             |
| <b>γ-Proteobacteria</b>                                        | <b>NAB-1</b>                                     |             | <b>NAB-2</b>                                                             |             |
| <i>Aeromonas hydrophila</i> subsp. <i>hydrophila</i> ATCC 7966 | YP_858601                                        |             | YP_858603                                                                |             |
| <i>Aeromonas salmonicida</i> subsp. <i>salmonicida</i> A449    | YP_001140096                                     |             | YP_001140094                                                             |             |
| <i>Alkalilimnicola ehrlichei</i> MLHE-1                        | YP_743154                                        |             | YP_743157                                                                |             |
| <i>Alteromonadales bacterium</i> TW-7                          | ZP_01612074                                      |             | ZP_01612070                                                              |             |
| <i>Alteromonas macleodii</i> 'Deep ecotype'                    | ZP_01110485                                      |             | ZP_01110476                                                              |             |
| <i>Azotobacter vinelandii</i> AvOP                             | ZP_00416273                                      |             |                                                                          |             |
| <i>Colwellia psychrerythraea</i> 34H                           | YP_268821                                        |             | YP_268824                                                                |             |

|                                                                                    |                 |                 |              |              |
|------------------------------------------------------------------------------------|-----------------|-----------------|--------------|--------------|
| <i>Escherichia coli</i> APEC O1                                                    | YP_854393       |                 | YP_854394    |              |
| <i>Escherichia coli</i> UTI89                                                      | YP_542349       |                 | YP_542350    |              |
| <i>Francisella tularensis</i> subsp. <i>holarctica</i>                             |                 |                 | YP_513685    |              |
| <i>Haemophilus ducreyi</i> 35000HP                                                 | NP_873215       |                 |              |              |
| <i>Haemophilus influenzae</i> 22.1-21                                              | ZP_01785141     |                 |              |              |
| <i>Haemophilus influenzae</i> 22.4-21                                              | ZP_01786684     |                 |              |              |
| <i>Haemophilus influenzae</i> 3655                                                 | ZP_01788996     |                 |              |              |
| <i>Haemophilus influenzae</i> 86-028NP                                             | YP_249309       |                 |              |              |
| <i>Haemophilus influenzae</i> PittAA                                               | ZP_01790101     |                 |              |              |
| <i>Haemophilus influenzae</i> PittEE                                               | YP_001290615    |                 |              |              |
| <i>Haemophilus influenzae</i> PittGG                                               | YP_001291778    |                 |              |              |
| <i>Haemophilus influenzae</i> PittHH                                               | ZP_01792523     |                 |              |              |
| <i>Haemophilus influenzae</i> PittII                                               | ZP_01794452     |                 |              |              |
| <i>Haemophilus influenzae</i> R2846                                                | ZP_00154934.2   |                 |              |              |
| <i>Haemophilus influenzae</i> R2866                                                | ZP_00157363.2   |                 |              |              |
| <i>Haemophilus influenzae</i> R3021                                                | ZP_0179767<br>5 | ZP_01797708     |              |              |
| <i>Haemophilus influenzae</i> Rd KW20                                              | NP_439432       |                 |              |              |
| <i>Haemophilus somnus</i> 129PT                                                    | YP_718918       |                 |              |              |
| <i>Haemophilus somnus</i> 2336                                                     | YP_001784447    |                 |              |              |
| <i>Hahella chejuensis</i> KCTC 2396                                                | YP_435951       | YP_436364       | YP_435954    | YP_436365    |
| <i>Idiomarina loihiensis</i> L2TR                                                  | YP_154910       | YP_154944       | YP_154941    | YP_154911    |
| <i>Legionella pneumophila</i> str. <i>Corby</i>                                    | YP_001251802    |                 | YP_001251801 | YP_001251785 |
| <i>Legionella pneumophila</i> str. <i>Lens</i>                                     | YP_126150       |                 | YP_126151    | YP_126168    |
| <i>Legionella pneumophila</i> str. <i>Paris</i>                                    | YP_123147       |                 | YP_123148    | YP_123162    |
| <i>Legionella pneumophila</i> subsp. <i>pneumophila</i> str. <i>Philadelphia 1</i> | YP_094787       |                 | YP_094788    | YP_094804    |
| <i>marine gamma proteobacterium</i> HTCC2207                                       |                 |                 | ZP_01225164  |              |
| <i>Marinobacter algicola</i> DG893                                                 |                 |                 | ZP_01894552  |              |
| <i>Marinobacter</i> sp. <i>ELB17</i>                                               | ZP_01738899     |                 | ZP_01738902  |              |
| <i>Marinomonas</i> sp. <i>MED121</i>                                               | ZP_01075554     |                 | ZP_01075556  |              |
| <i>Marinomonas</i> sp. <i>MWYL1</i>                                                | YP_001342399    |                 | YP_001342401 |              |
| <i>Moritella</i> sp. <i>PE36</i>                                                   | ZP_0189801<br>4 | ZP_01896204&187 | ZP_01896208  | ZP_01896186  |
| <i>Nitrococcus mobilis</i> Nb-231                                                  | ZP_0112753<br>9 | ZP_01126021     | ZP_01126018  | ZP_01126018  |
| <i>Oceanobacter</i> sp. <i>RED65</i>                                               | ZP_01306785     |                 | ZP_01306787  |              |
| <i>Oceanospirillum</i> sp. <i>MED92</i>                                            | ZP_01167341     |                 | ZP_01167812  | ZP_01167342  |
| <i>Pasteurella multocida</i> subsp. <i>multocida</i> str. <i>Pm70</i>              | NP_245124       |                 |              |              |
| <i>Photobacterium profundum</i> 3TCK                                               | ZP_0121868<br>8 | ZP_01218721     | ZP_01218684  | ZP_01218717  |
| <i>Photobacterium profundum</i> SS9                                                | YP_130889       |                 | YP_130887    |              |
| <i>Pseudoalteromonas atlantica</i> T6c                                             | YP_662638       |                 | YP_662636    |              |
| <i>Pseudoalteromonas tunicata</i> D2                                               | ZP_01132761     |                 | ZP_01132767  |              |
| <i>Pseudomonas entomophila</i> L48                                                 | YP_607270       |                 |              |              |
| <i>Pseudomonas fluorescens</i> Pf-5                                                | YP_258749       |                 | YP_258751    |              |
| <i>Pseudomonas fluorescens</i> Pfo-1                                               | YP_347253       |                 | YP_347255    |              |
| <i>Pseudomonas putida</i> F1                                                       | YP_001269217    |                 | YP_001266824 |              |
| <i>Pseudomonas putida</i> GB-1                                                     | YP_001667719    |                 |              |              |
| <i>Pseudomonas putida</i> KT2440                                                   | NP_743946       |                 |              |              |
| <i>Pseudomonas putida</i> W619                                                     | YP_001750560    |                 | YP_001750558 |              |
| <i>Pseudomonas stutzeri</i> A1501                                                  | YP_001174303    |                 | YP_001174300 |              |

|                                                                           |                                                                 |             |                                               |           |
|---------------------------------------------------------------------------|-----------------------------------------------------------------|-------------|-----------------------------------------------|-----------|
| <i>Psychrobacter arcticus</i> 273-4                                       | YP_263949                                                       |             | YP_263953                                     | YP_263955 |
| <i>Psychromonas</i> sp. CNPT3                                             | ZP_01215215                                                     |             | ZP_01215217                                   |           |
| <i>Reinekea</i> sp. MED297                                                | ZP_01114619                                                     |             | ZP_01114616                                   |           |
| <i>Shewanella amazonensis</i> SB2B                                        | YP_928211                                                       |             | YP_928206                                     |           |
| <i>Shewanella baltica</i> OS155                                           |                                                                 |             | YP_001051309                                  |           |
| <i>Shewanella baltica</i> OS185                                           | YP_001367175                                                    |             | YP_001367171                                  |           |
| <i>Shewanella baltica</i> OS195                                           | YP_001555547                                                    |             | YP_001555543                                  |           |
| <i>Shewanella baltica</i> OS223                                           |                                                                 |             | ZP_01840575                                   |           |
| <i>Shewanella denitrificans</i> OS217                                     | YP_562297                                                       |             | YP_562298                                     | YP_564113 |
| <i>Shewanella frigidimarina</i> NCIMB 400                                 | YP_751516                                                       |             |                                               |           |
| <i>Shewanella loihica</i> PV-4                                            | YP_001093456                                                    |             | YP_001093457                                  |           |
| <i>Shewanella oneidensis</i> MR-1                                         |                                                                 |             | NP_718815                                     |           |
| <i>Shewanella pealeana</i> ATCC 700345                                    | YP_001499916                                                    |             | YP_001499913                                  |           |
| <i>Shewanella putrefaciens</i> CN-32                                      | YP_001184147                                                    |             | YP_001184145                                  |           |
| <i>Shewanella sediminis</i> HAW-EB3                                       | YP_001474836                                                    |             | YP_001474832                                  |           |
| <i>Shewanella</i> sp. ANA-3                                               | YP_868949                                                       |             | YP_868944                                     |           |
| <i>Shewanella</i> sp. MR-7                                                | YP_737443                                                       |             | YP_737447                                     |           |
| <i>Shewanella</i> sp. W3-18-1                                             | YP_962777                                                       |             | YP_962779                                     |           |
| <i>Shewanella woodyi</i> ATCC 51908                                       | YP_001759959                                                    |             | YP_001759963                                  |           |
| <i>Thiomicrospira crunogena</i> XCL-2                                     | YP_391722                                                       |             | YP_391724                                     |           |
| <i>Vibrio fischeri</i> ES114                                              | YP_203530                                                       |             | YP_203526                                     |           |
| <i>Vibrio harveyi</i> ATCC BAA-1116                                       | YP_001443906                                                    |             | YP_001443899                                  |           |
| <i>Vibrio harveyi</i> HY01                                                | ZP_01987522                                                     |             | ZP_01987528                                   |           |
| <i>Vibrio parahaemolyticus</i> AQ3810                                     | ZP_01993064                                                     | ZP_01992254 | ZP_01992251                                   |           |
| <i>Vibrio parahaemolyticus</i> RIMD 2210633                               | NP_796582                                                       |             | NP_796579                                     |           |
| <i>Vibrio shilonii</i> AK1                                                | ZP_01867489                                                     |             | ZP_01867488                                   |           |
| <i>Vibrio</i> sp. Ex25                                                    | ZP_01475338                                                     | ZP_01475320 | ZP_01475341                                   |           |
| <i>Vibrio splendidus</i> 12B01                                            | ZP_00989910                                                     |             | ZP_00989905                                   |           |
| <i>Vibrio vulnificus</i> CMCP6                                            | NP_759780                                                       |             | NP_759785                                     |           |
| <i>Vibrio vulnificus</i> YJ016                                            | NP_933109                                                       |             | NP_933105                                     |           |
| <i>Vibrionales bacterium</i> SWAT-3                                       | ZP_01813606                                                     |             | ZP_01813603                                   |           |
| <i>Acinetobacter baumannii</i> ATCC 17978                                 | <i>Francisella tularensis</i> ss. <i>novicida</i> GA99-3549     |             | <i>Shewanella putrefaciens</i> 200            |           |
| <i>Acinetobacter</i> sp. ADP1                                             | <i>Francisella tularensis</i> ss. <i>novicida</i> U112          |             | <i>Shewanella</i> sp. MR-4                    |           |
| <i>Actinobacillus pleuropneumoniae</i> serovar 1 str. 4074                | <i>Francisella tularensis</i> ss. <i>tularensis</i> FSC033      |             | <i>Shigella boydii</i> CDC 3083-94            |           |
| <i>Actinobacillus succinogenes</i> 130Z                                   | <i>Francisella tularensis</i> subsp. <i>tularensis</i> FSC198   |             | <i>Shigella boydii</i> Sb227                  |           |
| <i>Aeromonas salmonicida</i> subsp. <i>salmonicida</i> A449               | <i>Francisella tularensis</i> ss. <i>tularensis</i> SCHU S4     |             | <i>Shigella dysenteriae</i> 1012              |           |
| <i>Alcanivorax borkumensis</i> SK2                                        | <i>Francisella tularensis</i> ss. <i>tularensis</i> WY96-3418   |             | <i>Shigella dysenteriae</i> Sd197             |           |
| <i>Baumannia cicadellinicola</i> str. Hc ( <i>Homalodisca coagulata</i> ) | <i>gamma proteobacterium</i> KT 71                              |             | <i>Shigella flexneri</i> 2a str. 2457T        |           |
| <i>Beggiatoa</i> sp. PS                                                   | <i>Halorhodospira halophila</i> SL1                             |             | <i>Shigella flexneri</i> 2a str. 301          |           |
| <i>Buchnera aphidicola</i> str. APS ( <i>Acyrtosiphon pisum</i> )         | <i>Idiomarina baltica</i> OS145                                 |             | <i>Shigella flexneri</i> 5 str. 8401          |           |
| <i>Buchnera aphidicola</i> str. Bp ( <i>Baizongia pistaciae</i> )         | <i>Klebsiella pneumoniae</i> subsp. <i>pneumoniae</i> MGH 78578 |             | <i>Shigella sonnei</i> Ss046                  |           |
| <i>Buchnera aphidicola</i> str. Cc ( <i>Cinara cedri</i> )                | <i>Mannheimia haemolytica</i> PHL213                            |             | <i>Sodalis glossinidius</i> str. 'morstitans' |           |
| <i>Buchnera aphidicola</i> str. Sg ( <i>Schizaphis graminum</i> )         | <i>Mannheimia succiniciproducens</i> MBEL55E                    |             | <i>Vibrio alginolyticus</i> 12G01             |           |
| <i>Candidatus Blochmannia floridanus</i>                                  | <i>marine gamma proteobacterium</i> HTCC2080                    |             | <i>Vibrio angustum</i> S14                    |           |
| <i>Candidatus Blochmannia pennsylvanicus</i> str. B PEN                   | <i>marine gamma proteobacterium</i> HTCC2143                    |             | <i>Vibrio cholerae</i> 1587                   |           |
| <i>Candidatus Carsonella ruddii</i> PV                                    | <i>Marinobacter aquaeolei</i> VT8                               |             | <i>Vibrio cholerae</i> 2740-80                |           |

|                                                                                |                                                                                  |                                                                                  |
|--------------------------------------------------------------------------------|----------------------------------------------------------------------------------|----------------------------------------------------------------------------------|
| <i>Candidatus Ruthia magnifica</i> str. Cm<br>( <i>Calypotgena magnifica</i> ) | <i>Methylococcus capsulatus</i> str. Bath                                        | <i>Vibrio cholerae</i> 623-39                                                    |
| <i>Candidatus Vesicomysocius okutanii</i> HA                                   | <i>Neptuniibacter caesariensis</i>                                               | <i>Vibrio cholerae</i> AM-19226                                                  |
| <i>Chromohalobacter salexigens</i> DSM 3043                                    | <i>Nitrosococcus oceani</i> ATCC 19707                                           | <i>Vibrio cholerae</i> B33                                                       |
| <i>Citrobacter koseri</i> ATCC BAA-895                                         | <i>Photobacterium</i> sp. SKA34                                                  | <i>Vibrio cholerae</i> MAK 757                                                   |
| <i>Coxiella burnetii</i> Dugway 5J108-111                                      | <i>Photorhabdus luminescens</i> subsp. laumondii<br>TTO1                         | <i>Vibrio cholerae</i> MO10                                                      |
| <i>Coxiella burnetii</i> Dugway 7E9-12                                         | <i>Pseudoalteromonas haloplanktis</i> TAC125                                     | <i>Vibrio cholerae</i> MZO-2                                                     |
| <i>Coxiella burnetii</i> 'MSU Goat Q177'                                       | <i>Pseudomonas aeruginosa</i> 2192                                               | <i>Vibrio cholerae</i> MZO-3                                                     |
| <i>Coxiella burnetii</i> RSA 331                                               | <i>Pseudomonas aeruginosa</i> C3719                                              | <i>Vibrio cholerae</i> NCTC 8457                                                 |
| <i>Coxiella burnetii</i> RSA 334                                               | <i>Pseudomonas aeruginosa</i> PA7                                                | <i>Vibrio cholerae</i> O1 biovar eltor str. N16961                               |
| <i>Coxiella burnetii</i> RSA 493                                               | <i>Pseudomonas aeruginosa</i> PACS2                                              | <i>Vibrio cholerae</i> O395                                                      |
| <i>Citrobacillus pleuropneumoniae</i> L20                                      | <i>Pseudomonas aeruginosa</i> PAO1                                               | <i>Vibrio cholerae</i> RC385                                                     |
| <i>Dichelobacter nodosus</i> VCS1703A                                          | <i>Pseudomonas aeruginosa</i> UCBPP-PA14                                         | <i>Vibrio cholerae</i> V51                                                       |
| <i>Endoriftia persephone</i> 'Hot96_1+Hot96_2'                                 | <i>Pseudomonas mendocina</i> ymp                                                 | <i>Vibrio cholerae</i> V52                                                       |
| <i>Enterobacter sakazakii</i> ATCC BAA-894                                     | <i>Pseudomonas syringae</i> pv. phaseolicola<br>1448A                            | <i>Vibrio</i> sp. MED222                                                         |
| <i>Enterobacter</i> sp. 638                                                    | <i>Pseudomonas syringae</i> pv. syringae B728a                                   | <i>Wigglesworthia glossinidia</i> endosymbiont of<br><i>Glossina brevipalpis</i> |
| <i>Erwinia carotovora</i> subsp. atroseptica<br>SCRI1043                       | <i>Pseudomonas syringae</i> pv. tomato str.<br>DC3000                            | <i>Yersinia bercovieri</i> ATCC 43970                                            |
| <i>Escherichia coli</i> 101-1                                                  | <i>Psychrobacter cryohalolentis</i> K5                                           | <i>Yersinia enterocolitica</i> subsp. enterocolitica<br>8081                     |
| <i>Escherichia coli</i> 536                                                    | <i>Psychrobacter</i> sp. PRwf-1                                                  | <i>Yersinia frederiksenii</i> ATCC 33641                                         |
| <i>Escherichia coli</i> 53638                                                  | <i>Psychromonas ingrahamii</i> 37                                                | <i>Yersinia intermedia</i> ATCC 29909                                            |
| <i>Escherichia coli</i> B                                                      | <i>Rickettsiella grylli</i>                                                      | <i>Yersinia mollaretii</i> ATCC 43969                                            |
| <i>Escherichia coli</i> B171                                                   | <i>Saccharophagus degradans</i> 2-40                                             | <i>Yersinia pestis</i> Angola                                                    |
| <i>Escherichia coli</i> B7A                                                    | <i>Salmonella enterica</i> subsp. enterica serovar<br>4,[5],12:i:- str. CVM23701 | <i>Yersinia pestis</i> Antiqua                                                   |
| <i>Escherichia coli</i> CFT073                                                 | <i>S. enterica</i> subsp. enterica serovar Agona str.<br>SL483                   | <i>Yersinia pestis</i> biovar Antiqua str. B42003004                             |
| <i>Escherichia coli</i> E110019                                                | <i>S. enterica</i> subsp. enterica serovar<br>Choleraesuis str. SC-B67           | <i>Yersinia pestis</i> biovar Antiqua str. E1979001                              |
| <i>Escherichia coli</i> E22                                                    | <i>S. enterica</i> subsp. enterica serovar Dublin str.<br>CT_02021853            | <i>Yersinia pestis</i> biovar Antiqua str. UG05-0454                             |
| <i>Escherichia coli</i> E24377A                                                | <i>S. enterica</i> subsp. enterica serovar Heidelberg<br>str. SL476              | <i>Yersinia pestis</i> biovar Mediaevalis str. K1973002                          |
| <i>Escherichia coli</i> F11                                                    | <i>S. enterica</i> subsp. enterica serovar Javiana str.<br>GA_MM04042433         | <i>Yersinia pestis</i> biovar Microtus str. 91001                                |
| <i>Escherichia coli</i> HS                                                     | <i>S. enterica</i> subsp. enterica serovar Kentucky<br>str. CDC 191              | <i>Yersinia pestis</i> biovar Microtus str. 91001                                |
| <i>Escherichia coli</i> O157:H7 EDL933                                         | <i>S. enterica</i> subsp. enterica serovar Kentucky<br>str. CVM29188             | <i>Yersinia pestis</i> biovar Orientalis str. F1991016                           |
| <i>Escherichia coli</i> O157:H7 str. Sakai                                     | <i>S. enterica</i> subsp. enterica serovar Newport<br>str. SL254                 | <i>Yersinia pestis</i> biovar Orientalis str. IP275                              |
| <i>Escherichia coli</i> SECEC SMS-3-5                                          | <i>S. enterica</i> subsp. enterica serovar Newport<br>str. SL317                 | <i>Yersinia pestis</i> biovar Orientalis str. MG05-1020                          |
| <i>Escherichia coli</i> str. K-12 substr. MG1655                               | <i>S. enterica</i> subsp. enterica serovar Paratyphi<br>A str. ATCC 9150         | <i>Yersinia pestis</i> CA88-4125                                                 |
| <i>Escherichia coli</i> W3110                                                  | <i>S. enterica</i> subsp. enterica serovar Saintpaul<br>str. SARA23              | <i>Yersinia pestis</i> CO92                                                      |
| <i>Francisella tularensis</i> subsp. holarctica 257                            | <i>S. enterica</i> subsp. enterica serovar Saintpaul<br>str. SARA29              | <i>Yersinia pestis</i> FV-1                                                      |
| <i>Francisella tularensis</i> subsp. holarctica<br>FSC022                      | <i>S. enterica</i> subsp. enterica serovar<br>Schwarzengrund str. CVM19633       | <i>Yersinia pestis</i> KIM                                                       |
| <i>Francisella tularensis</i> subsp. holarctica<br>FSC200                      | <i>S. enterica</i> subsp. enterica serovar<br>Schwarzengrund str. SL480          | <i>Yersinia pestis</i> Nepal516                                                  |
| <i>Francisella tularensis</i> subsp. holarctica FTA                            | <i>S. enterica</i> subsp. enterica serovar Typhi str.<br>CT18                    | <i>Yersinia pestis</i> Pestoides F                                               |
| <i>Francisella tularensis</i> subsp. holarctica<br>FTNF002-00                  | <i>S. enterica</i> subsp. enterica serovar Typhi Ty2                             | <i>Yersinia pseudotuberculosis</i> IP 31758                                      |
| <i>Francisella tularensis</i> subsp. holarctica OSU18                          | <i>Salmonella typhimurium</i> LT2                                                | <i>Yersinia pseudotuberculosis</i> IP 3295                                       |
| <i>Francisella tularensis</i> subsp. novicida GA99-<br>3548                    | <i>Serratia proteamaculans</i> 568                                               |                                                                                  |
| <b>β-Proteobacteria</b>                                                        | <b>NAB-1</b>                                                                     | <b>NAB-2</b>                                                                     |

|                                                                     |                                                |              |                                              |              |
|---------------------------------------------------------------------|------------------------------------------------|--------------|----------------------------------------------|--------------|
| <i>Burkholderia cenocepacia</i> MC0-3                               | YP_001765854                                   |              |                                              |              |
| <i>Burkholderia phymatum</i> STM815                                 | YP_001859225                                   |              | YP_001859224                                 |              |
| <i>Burkholderia pseudomallei</i> S13                                | ZP_01329806                                    |              |                                              |              |
| <i>Chromobacterium violaceum</i> ATCC 12472                         | NP_903698                                      |              | NP_903701                                    |              |
| <i>Dechloromonas aromatica</i> RCB                                  | YP_284470                                      |              | YP_284473                                    |              |
| <i>Hermiimonas arsenicoxydans</i>                                   |                                                |              | YP_001099432                                 |              |
| <i>Methylophilales bacterium</i> HTCC2181                           | ZP_01552361                                    | NP_841608    | NP_841609                                    |              |
| <i>Neisseria meningitidis</i> FAM18                                 | YP_974195                                      |              | YP_974194                                    |              |
| <i>Neisseria meningitidis</i> MC58                                  | NP_273133                                      |              | NP_273132                                    |              |
| <i>Nitrosomonas europaea</i> ATCC 19718                             | NP_841608                                      |              | NP_841609                                    |              |
| <i>Nitrosomonas eutropha</i> C91                                    | YP_747757                                      |              | YP_747758                                    |              |
| <i>Nitrospira multiformis</i> ATCC 25196                            | YP_411110                                      |              | YP_411108                                    |              |
| <i>Ralstonia pickettii</i> 12D                                      |                                                |              | ZP_02007588                                  |              |
| <i>Verminephrobacter eiseniae</i> EF01-2                            | YP_999560                                      |              | YP_999561                                    |              |
| <i>Acidovorax avenae</i> subsp. <i>citrulli</i> AAC00-1             | <i>Burkholderia oklahomensis</i> EO147         |              | <i>Burkholderia thailandensis</i> E264       |              |
| <i>Acidovorax</i> sp. JS42                                          | <i>Burkholderia phytofirmans</i> PsJN          |              | <i>Burkholderia thailandensis</i> TXDOH      |              |
| <i>Azoarcus</i> sp. BH72                                            | <i>Burkholderia pseudomallei</i> 1106a         |              | <i>Burkholderia ubonensis</i> Bu             |              |
| <i>Azoarcus</i> sp. EbN1                                            | <i>Burkholderia pseudomallei</i> 1106b         |              | <i>Burkholderia vietnamiensis</i> G4         |              |
| <i>Bordetella bronchiseptica</i> RB50                               | <i>Burkholderia pseudomallei</i> 112           |              | <i>Burkholderia xenovorans</i> LB400         |              |
| <i>Bordetella parapertussis</i> 12822                               | <i>Burkholderia pseudomallei</i> 14            |              | <i>Comamonas testosteroni</i> KF-1           |              |
| <i>Bordetella pertussis</i> Tohama I                                | <i>Burkholderia pseudomallei</i> 1655          |              | <i>Delftia acidovorans</i> SPH-1             |              |
| <i>Burkholderia ambifaria</i> AMMD                                  | <i>Burkholderia pseudomallei</i> 1710a         |              | <i>ethylbium petroleiphilum</i> PMI          |              |
| <i>Burkholderia ambifaria</i> MC40-6                                | <i>Burkholderia pseudomallei</i> 1710b         |              | <i>Janthinobacterium</i> sp. Marseille       |              |
| <i>Burkholderia cenocepacia</i> AU 1054                             | <i>Burkholderia pseudomallei</i> 305           |              | <i>Limnobacter</i> sp. MED105                |              |
| <i>Burkholderia cenocepacia</i> HI2424                              | <i>Burkholderia pseudomallei</i> 381           |              | <i>Methylobacillus flagellatus</i> KT        |              |
| <i>Burkholderia dolosa</i> AUO158                                   | <i>Burkholderia pseudomallei</i> 406e          |              | <i>Neisseria gonorrhoeae</i> FA 1090         |              |
| <i>Burkholderia mallei</i> 2002721280                               | <i>Burkholderia pseudomallei</i> 668           |              | <i>Neisseria meningitidis</i> Z2491          |              |
| <i>Burkholderia mallei</i> ATCC 10399                               | <i>Burkholderia pseudomallei</i> 7894          |              | <i>Polaromonas naphthalenivorans</i> CJ2     |              |
| <i>Burkholderia mallei</i> ATCC 23344                               | <i>Burkholderia pseudomallei</i> 9             |              | <i>Polaromonas</i> sp. JS666                 |              |
| <i>Burkholderia mallei</i> FMH                                      | <i>Burkholderia pseudomallei</i> 91            |              | <i>Polynucleobacter</i> sp. QLW-PIDMWA-1     |              |
| <i>Burkholderia mallei</i> GB8 horse 4                              | <i>Burkholderia pseudomallei</i> B7210         |              | <i>Ralstonia eutropha</i> H16                |              |
| <i>Burkholderia mallei</i> JHU                                      | <i>Burkholderia pseudomallei</i> BCC215        |              | <i>Ralstonia eutropha</i> JMP134             |              |
| <i>Burkholderia mallei</i> NCTC 10229                               | <i>Burkholderia pseudomallei</i> DM98          |              | <i>Ralstonia metallidurans</i> CH34          |              |
| <i>Burkholderia mallei</i> NCTC 10247                               | <i>Burkholderia pseudomallei</i> K96243        |              | <i>Ralstonia pickettii</i> 12J               |              |
| <i>Burkholderia mallei</i> PRL-20                                   | <i>Burkholderia pseudomallei</i> NCTC 13177    |              | <i>Ralstonia solanacearum</i> GMI1000        |              |
| <i>Burkholderia mallei</i> SAVP1                                    | <i>Burkholderia pseudomallei</i> Pasteur 52237 |              | <i>Ralstonia solanacearum</i> UW551          |              |
| <i>Burkholderia multivorans</i> ATCC 17616                          | <i>Burkholderia</i> sp. 383                    |              | <i>Rhodoferax ferrireducens</i> T118         |              |
| <i>Burkholderia oklahomensis</i> C6786                              | <i>Burkholderia thailandensis</i> Bt4          |              | <i>Thiobacillus denitrificans</i> ATCC 25259 |              |
| <b>Firmicutes</b>                                                   | <b>NAB-1</b>                                   |              | <b>NAB-2</b>                                 |              |
| <i>Alkaliphilus oremlandii</i> OhILAs                               | YP_001514040                                   |              | YP_001514037                                 |              |
| <i>Bacillus amyloliquefaciens</i> FZB42                             |                                                |              | YP_001423072                                 |              |
| <i>Bacillus cereus</i> G9241                                        | ZP_00236340                                    | ZP_00239762  | ZP_00236342                                  |              |
| <i>Bacillus pumilus</i> SAFR-032                                    | YP_001487128                                   |              | ZP_01724639                                  | YP_001488643 |
| <i>Bacillus</i> sp. B14905                                          | ZP_01724636                                    |              | ZP_01724639                                  |              |
| <i>Bacillus subtilis</i> subsp. <i>subtilis</i> str. 168            |                                                |              | NP_391666                                    |              |
| <i>Bacillus thuringiensis</i> serovar <i>israelensis</i> ATCC 35646 |                                                |              | ZP_00741540                                  |              |
| <i>Clostridium acetobutylicum</i> ATCC 824                          |                                                |              | NP_348805                                    |              |
| <i>Clostridium beijerinckii</i> NCIMB 8052                          | YP_001311347                                   |              | YP_001311344                                 |              |
| <i>Clostridium botulinum</i> A str. ATCC 19397                      | YP_0013849                                     | YP_001384963 | YP_001384922                                 |              |



|                                                            |                                               |                 |                  |                                                |
|------------------------------------------------------------|-----------------------------------------------|-----------------|------------------|------------------------------------------------|
|                                                            | 23                                            |                 | YP_0013849<br>62 |                                                |
| <i>Clostridium botulinum A str. ATCC 3502</i>              | YP_0012551<br>80                              | YP_001255220    | YP_0012552<br>19 | YP_001255179                                   |
| <i>Clostridium botulinum A str. Hall</i>                   | YP_0013883<br>92                              | YP_001388433    | YP_0013883<br>91 | YP_001388432                                   |
| <i>Clostridium botulinum F str. Langeland</i>              | YP_0013920<br>01                              | YP_001391979    | YP_0013920<br>03 | YP_001391978                                   |
| <i>Clostridium difficile QCD-32g58</i>                     | ZP_01801682                                   |                 |                  |                                                |
| <i>Clostridium kluyveri DSM 555</i>                        | YP_0013958<br>49                              | YP_001395014    | YP_0013958<br>55 | YP_001395492                                   |
| <i>Clostridium novyi NT</i>                                | YP_877856                                     |                 | YP_877857        | YP_877964                                      |
| <i>Clostridium tetani E88</i>                              | NP_782308                                     | NP_781273       | NP_782309        |                                                |
| <i>Clostridium thermocellum ATCC 27405</i>                 | YP_0010390<br>31                              | YP_001038625    | YP_0010390<br>33 | YP_001038624                                   |
| <i>Desulfotobacterium hafniense DCB-2</i>                  |                                               |                 | ZP_01372474      |                                                |
| <i>Desulfotobacterium hafniense Y51</i>                    | YP_519540                                     |                 | YP_520419        |                                                |
| <i>Enterococcus faecium DO</i>                             | ZP_00604822                                   |                 | ZP_00604816      |                                                |
| <i>Geobacillus kaustophilus HTA426</i>                     | YP_148973                                     |                 | YP_148976        |                                                |
| <i>Haloferoxylum orenii H 168</i>                          |                                               |                 | ZP_0118851<br>1  | ZP_01188516                                    |
| <i>Lactobacillus johnsonii NCC 533</i>                     |                                               | NP_965637       |                  |                                                |
| <i>Lactococcus lactis ssp. cremoris SK1</i>                |                                               | YP_808727       |                  |                                                |
| <i>Lactococcus lactis subsp. lactis II140</i>              |                                               | NP_266866       |                  |                                                |
| <i>Moorella thermoacetica ATCC 39073</i>                   | YP_429619                                     |                 | YP_429617        |                                                |
| <i>Ruminococcus gnavus ATCC 29149</i>                      | ZP_02041060                                   |                 | ZP_02041061      |                                                |
| <i>Streptococcus agalactiae 18RS21</i>                     | ZP_0078188<br>0                               | ZP_0078016<br>3 | ZP_007819<br>66  | ZP_00781900                                    |
| <i>Streptococcus agalactiae 2603V/R</i>                    | NP_688167                                     | NP_688113       |                  | NP_688170                                      |
| <i>Streptococcus agalactiae 515</i>                        | ZP_0078899<br>8                               | ZP_00789247     |                  | ZP_00789031                                    |
| <i>Streptococcus agalactiae A909</i>                       | YP_329861                                     | YP_329810       |                  | YP_329864                                      |
| <i>Streptococcus agalactiae CJB111</i>                     | ZP_0078853<br>8                               | ZP_00786919     |                  | ZP_00788547                                    |
| <i>Streptococcus agalactiae COH1</i>                       | ZP_0078570<br>7                               | ZP_00785426     |                  | ZP_00785697                                    |
| <i>Streptococcus agalactiae H36B</i>                       | ZP_0078297<br>8                               | ZP_00782941     |                  | ZP_00782986                                    |
| <i>Streptococcus agalactiae NEM316</i>                     | NP_735677                                     | NP_735617       |                  | NP_735680                                      |
| <i>Streptococcus mutans UA159</i>                          |                                               | NP_721495       |                  |                                                |
| <i>Streptococcus suis 05ZYH33</i>                          | YP_001197947                                  |                 |                  | YP_001197944                                   |
| <i>Streptococcus suis 89/1591</i>                          | ZP_0087590<br>3                               | ZP_00875443     |                  | ZP_00875906                                    |
| <i>Streptococcus suis 98HAH33</i>                          | YP_001200143                                  |                 |                  | YP_001200140                                   |
| <i>Streptococcus thermophilus CNRZ1</i>                    |                                               | YP_141453       |                  |                                                |
| <i>Streptococcus thermophilus LMD-9</i>                    |                                               | YP_820445       |                  |                                                |
| <i>Streptococcus thermophilus LMG 18</i>                   |                                               | YP_139528       |                  |                                                |
| <i>Syntrophomonas wolfei subsp. wolfei str. Goettingen</i> |                                               |                 | YP_752933        |                                                |
| <i>Thermoanaerobacter pseudethanolicus ATCC 33223</i>      |                                               |                 | YP_001664975     |                                                |
| <i>Thermoanaerobacter sp. X514</i>                         |                                               |                 | YP_001663050     |                                                |
| <i>Thermoanaerobacter tengcongensis MB4</i>                |                                               |                 | NP_622664        |                                                |
| <i>Thermosinus carboxydivorans Nor1</i>                    | ZP_01667693                                   |                 |                  |                                                |
| <i>Alkaliphilus metalliredigens QYMF</i>                   | <i>Eubacterium dolichum DSM 3991</i>          |                 |                  | <i>Pelotomaculum thermopropionicum SI</i>      |
| <i>Anaerostipes caccae DSM 14662</i>                       | <i>Eubacterium siraeum DSM 15702</i>          |                 |                  | <i>Peptostreptococcus micros ATCC 33270</i>    |
| <i>Bacillus anthracis str. A1055</i>                       | <i>Eubacterium ventriosum ATCC 27560</i>      |                 |                  | <i>Ruminococcus obeum ATCC 29174</i>           |
| <i>Bacillus anthracis str. A2012</i>                       | <i>Exiguobacterium sibiricum 255-15</i>       |                 |                  | <i>Ruminococcus torques ATCC 27756</i>         |
| <i>Bacillus anthracis str. Ames</i>                        | <i>Faecalibacterium prausnitzii M21/2</i>     |                 |                  | <i>Staphylococcus aureus RF122</i>             |
| <i>Bacillus anthracis str. 'Ames Ancestor'</i>             | <i>Geobacillus thermodenitrificans NG80-2</i> |                 |                  | <i>Staphylococcus aureus subsp. aureus COL</i> |

|                                                                   |                                                                        |                                                                            |
|-------------------------------------------------------------------|------------------------------------------------------------------------|----------------------------------------------------------------------------|
| <i>Bacillus anthracis</i> str. Australia 94                       | <i>Lactobacillus acidophilus</i> NCFM                                  | <i>Staphylococcus aureus</i> subsp. <i>aureus</i> JH1                      |
| <i>Bacillus anthracis</i> str. CNEVA-9066                         | <i>Lactobacillus brevis</i> ATCC 367                                   | <i>Staphylococcus aureus</i> subsp. <i>aureus</i> JH9                      |
| <i>Bacillus anthracis</i> str. Kruger B                           | <i>Lactobacillus casei</i> ATCC 334                                    | <i>Staphylococcus aureus</i> subsp. <i>aureus</i> MRSA252                  |
| <i>Bacillus anthracis</i> str. Sterne                             | <i>Lactobacillus delbrueckii</i> subsp. <i>bulgaricus</i> ATCC 11842   | <i>Staphylococcus aureus</i> subsp. <i>aureus</i> MSSA476                  |
| <i>Bacillus anthracis</i> str. Vollum                             | <i>Lactobacillus delbrueckii</i> subsp. <i>bulgaricus</i> ATCC BAA-365 | <i>Staphylococcus aureus</i> subsp. <i>aureus</i> Mu3                      |
| <i>Bacillus anthracis</i> str. Western North America USA6153      | <i>Lactobacillus gasseri</i> ATCC 33323                                | <i>Staphylococcus aureus</i> subsp. <i>aureus</i> Mu50                     |
| <i>Bacillus anthracis</i> Tsiankovskii-1                          | <i>Lactobacillus plantarum</i> WCFS1                                   | <i>Staphylococcus aureus</i> subsp. <i>aureus</i> MW2                      |
| <i>Bacillus cereus</i> 03BB108                                    | <i>Lactobacillus reuteri</i> 100-23                                    | <i>Staphylococcus aureus</i> subsp. <i>aureus</i> N315                     |
| <i>Bacillus cereus</i> AH1134                                     | <i>Lactobacillus reuteri</i> F275                                      | <i>Staphylococcus aureus</i> subsp. <i>aureus</i> NCTC 8325                |
| <i>Bacillus cereus</i> AH187                                      | <i>Lactobacillus sakei</i> subsp. <i>sakei</i> 23K                     | <i>Staphylococcus aureus</i> subsp. <i>aureus</i> str. Newman              |
| <i>Bacillus cereus</i> AH820                                      | <i>Lactobacillus salivarius</i> subsp. <i>salivarius</i> UCC118        | <i>Staphylococcus aureus</i> subsp. <i>aureus</i> USA300                   |
| <i>Bacillus cereus</i> ATCC 10987                                 | <i>Lactococcus lactis</i> subsp. <i>cremoris</i> MG1363                | <i>Staphylococcus epidermidis</i> ATCC 12228                               |
| <i>Bacillus cereus</i> ATCC 14579                                 | <i>Leuconostoc mesenteroides</i> subsp. <i>mesenteroides</i> ATCC 8293 | <i>Staphylococcus epidermidis</i> RP62A                                    |
| <i>Bacillus cereus</i> B4264                                      | <i>Listeria innocua</i> Clip11262                                      | <i>Staphylococcus haemolyticus</i> JCSC1435                                |
| <i>Bacillus cereus</i> E33L                                       | <i>Listeria monocytogenes</i> 10403S                                   | <i>Staphylococcus saprophyticus</i> subsp. <i>saprophyticus</i> ATCC 15305 |
| <i>Bacillus cereus</i> H3081.97                                   | <i>Listeria monocytogenes</i> EGD-e                                    | <i>Streptococcus gordonii</i> str. Challis substr. CH1                     |
| <i>Bacillus cereus</i> NVH0597-99                                 | <i>Listeria monocytogenes</i> F6900                                    | <i>Streptococcus pneumoniae</i> D39                                        |
| <i>Bacillus cereus</i> subsp. <i>cytotoxis</i> NVH 391-98         | <i>Listeria monocytogenes</i> FSL F2-515                               | <i>Streptococcus pneumoniae</i> R6                                         |
| <i>Bacillus cereus</i> W                                          | <i>Listeria monocytogenes</i> FSL J1-175                               | <i>Streptococcus pneumoniae</i> SP11-BS70                                  |
| <i>Bacillus clausii</i> KSM-K16                                   | <i>Listeria monocytogenes</i> FSL J1-194                               | <i>Streptococcus pneumoniae</i> SP14-BS69                                  |
| <i>Bacillus coagulans</i> 36D1                                    | <i>Listeria monocytogenes</i> FSL J1-208                               | <i>Streptococcus pneumoniae</i> SP18-BS74                                  |
| <i>Bacillus halodurans</i> C-125                                  | <i>Listeria monocytogenes</i> FSL J2-003                               | <i>Streptococcus pneumoniae</i> SP19-BS75                                  |
| <i>Bacillus licheniformis</i> ATCC 14580                          | <i>Listeria monocytogenes</i> FSL J2-064                               | <i>Streptococcus pneumoniae</i> SP23-BS72                                  |
| <i>Bacillus</i> sp. NRRL B-14911                                  | <i>Listeria monocytogenes</i> FSL J2-071                               | <i>Streptococcus pneumoniae</i> SP3-BS71                                   |
| <i>Bacillus</i> sp. SG-1                                          | <i>Listeria monocytogenes</i> FSL N1-017                               | <i>Streptococcus pneumoniae</i> SP6-BS73                                   |
| <i>Bacillus thuringiensis</i> serovar <i>konkukian</i> str. 97-27 | <i>Listeria monocytogenes</i> FSL N3-165                               | <i>Streptococcus pneumoniae</i> SP9-BS68                                   |
| <i>Bacillus thuringiensis</i> str. Al Hakam                       | <i>Listeria monocytogenes</i> FSL R2-503                               | <i>Streptococcus pneumoniae</i> TIGR4                                      |
| <i>Bacillus weihenstephanensis</i> KBAB4                          | <i>Listeria monocytogenes</i> HPB2262                                  | <i>Streptococcus pyogenes</i> M1 GAS                                       |
| <i>Caldicellulosiruptor saccharolyticus</i> DSM 8903              | <i>Listeria monocytogenes</i> J0161                                    | <i>Streptococcus pyogenes</i> M49 591                                      |
| <i>Carboxythermus hydrogenoformans</i> Z-2901                     | <i>Listeria monocytogenes</i> J2818                                    | <i>Streptococcus pyogenes</i> MGAS10270                                    |
| <i>Clostridium boltea</i> ATCC BAA-613                            | <i>Listeria monocytogenes</i> LO28                                     | <i>Streptococcus pyogenes</i> MGAS10394                                    |
| <i>Clostridium botulinum</i> A str. Hall                          | <i>Listeria monocytogenes</i> str. 1/2a F6854                          | <i>Streptococcus pyogenes</i> MGAS10750                                    |
| <i>Clostridium botulinum</i> Bf                                   | <i>Listeria monocytogenes</i> str. 4b F2365                            | <i>Streptococcus pyogenes</i> MGAS2096                                     |
| <i>Clostridium botulinum</i> C str. Eklund                        | <i>Listeria monocytogenes</i> str. 4b H7858                            | <i>Streptococcus pyogenes</i> MGAS315                                      |
| <i>Clostridium botulinum</i> G                                    | <i>Listeria welshimeri</i> serovar 6b str. SLCC5334                    | <i>Streptococcus pyogenes</i> MGAS5005                                     |
| <i>Clostridium botulinum</i> NCTC 2916                            | <i>Mesoplasma florum</i> L1                                            | <i>Streptococcus pyogenes</i> MGAS6180                                     |
| <i>Clostridium botulinum</i> str. Iwanei E                        | <i>Mycoplasma agalactiae</i> PG2                                       | <i>Streptococcus pyogenes</i> MGAS8232                                     |
| <i>Clostridium butyricum</i> 5521                                 | <i>Mycoplasma capricolum</i> subsp. <i>capricolum</i> ATCC 27343       | <i>Streptococcus pyogenes</i> MGAS9429                                     |
| <i>Clostridium cellulolyticum</i> H10                             | <i>Mycoplasma gallisepticum</i> R                                      | <i>Streptococcus pyogenes</i> SSI-1                                        |
| <i>Clostridium difficile</i> 630                                  | <i>Mycoplasma genitalium</i> G37                                       | <i>Streptococcus pyogenes</i> str. Manfredo                                |
| <i>Clostridium difficile</i> QCD-66c26                            | <i>Mycoplasma hyopneumoniae</i> 232                                    | <i>Streptococcus sanguinis</i> SK36                                        |
| <i>Clostridium leptum</i> DSM 753                                 | <i>Mycoplasma hyopneumoniae</i> 7448                                   | <i>Streptococcus thermophilus</i> CNRZ1066                                 |
| <i>Clostridium perfringens</i> ATCC 13124                         | <i>Mycoplasma hyopneumoniae</i> J                                      | <i>Symbiobacterium thermophilum</i> IAM 14863                              |
| <i>Clostridium perfringens</i> B str. ATCC 3626                   | <i>Mycoplasma mobile</i> 163K                                          | <i>Ureaplasma parvum</i> serovar 1                                         |
| <i>Clostridium perfringens</i> C str. JGS1495                     | <i>Mycoplasma mycoides</i> subsp. <i>mycoides</i> LC str. GM12         | <i>Ureaplasma parvum</i> serovar 14                                        |
| <i>Clostridium perfringens</i> CPE str. F4969                     | <i>Mycoplasma mycoides</i> subsp. <i>mycoides</i> SC str. PG1          | <i>Ureaplasma parvum</i> serovar 3                                         |

|                                                  |                                                                   |                                                     |
|--------------------------------------------------|-------------------------------------------------------------------|-----------------------------------------------------|
| <i>Clostridium perfringens</i> E str. JGS1987    | <i>Mycoplasma penetrans</i> HF-2                                  | <i>Ureaplasma parvum</i> serovar 3 str. ATCC 700970 |
| <i>Clostridium perfringens</i> NCTC 8239         | <i>Mycoplasma pneumoniae</i> M129                                 | <i>Ureaplasma parvum</i> serovar 6                  |
| <i>Clostridium perfringens</i> SM101             | <i>Mycoplasma pulmonis</i> UAB CTIP                               | <i>Ureaplasma urealyticum</i> serovar 10            |
| <i>Clostridium perfringens</i> str. 13           | <i>Mycoplasma synoviae</i> 53                                     | <i>Ureaplasma urealyticum</i> serovar 11            |
| <i>Clostridium phytofermentans</i> ISDg          | <i>Oceanobacillus ihoyensis</i> HTE831                            | <i>Ureaplasma urealyticum</i> serovar 12            |
| <i>Clostridium</i> sp. L2-50                     | <i>Oenococcus oeni</i> ATCC BAA-1163                              | <i>Ureaplasma urealyticum</i> serovar 13            |
| <i>Desulfotomaculum reducens</i> MI-1            | <i>Oenococcus oeni</i> PSU-1                                      | <i>Ureaplasma urealyticum</i> serovar 4             |
| <i>Dorea longicatena</i> DSM 13814               | Onion yellows phytoplasma OY-M                                    | <i>Ureaplasma urealyticum</i> serovar 5             |
| <i>Enterococcus faecalis</i> V583                | <i>Paenibacillus larvae</i> subsp. <i>larvae</i> BRL-230010       | <i>Ureaplasma urealyticum</i> serovar 7             |
| <i>Epulopiscium</i> sp. 'N.t. morphotype B'      | <i>Pasteuria nishizawae</i> str. North American                   | <i>Ureaplasma urealyticum</i> serovar 8             |
|                                                  | <i>Pediococcus pentosaceus</i> ATCC 25745                         | <i>Ureaplasma urealyticum</i> serovar 9             |
| <b>Archaea</b>                                   | <b>NAB-1</b>                                                      | <b>NAB-2</b>                                        |
| <i>Haloquadratum walsbyi</i> DSM 16790           | YP_659191                                                         | YP_659192                                           |
| <i>Methanobrevibacter smithii</i> ATCC 35061     | YP_001273517                                                      | YP_001274112                                        |
| <i>Methanocaldococcus jannaschii</i> DSM 2661    | NP_247475                                                         | NP_248059                                           |
| <i>Methanococcoides burtonii</i> DSM 6242        | YP_566239                                                         | YP_566240                                           |
| <i>Methanococcus aeolicus</i> Nankai-3           | YP_001324615                                                      | YP_001324618                                        |
| <i>Methanococcus maripaludis</i> C5              | YP_001097036                                                      | YP_001097035                                        |
| <i>Methanosarcina acetivorans</i> C2A            | NP_618639                                                         | NP_618640                                           |
| <i>Methanosarcina barkeri</i> str. <i>Fusaro</i> | YP_306910                                                         |                                                     |
| <i>Methanospirillum hungatei</i> JF-1            | YP_504500                                                         | YP_504504                                           |
| <i>Methanococcus vannielii</i> SB                | <i>Methanococcus maripaludis</i> C7                               | <i>Pyrobaculum calidifontis</i> JCM 11548           |
| <i>Methanoculleus marisnigri</i> JR1             | <i>Methanococcus maripaludis</i> S2                               | <i>Pyrobaculum islandicum</i> DSM 4184              |
| <i>Aeropyrum pernix</i> K1                       | <i>Methanocorpusculum labreanum</i> Z                             | <i>Pyrococcus abyssi</i> GE5                        |
| <i>Archaeoglobus fulgidus</i> DSM 4304           | <i>Methanopyrus kandleri</i> AV19                                 | <i>Pyrococcus furiosus</i> DSM 3638                 |
| <i>Caldivirga maquilingensis</i> IC-167          | <i>Methanoaeta thermophila</i> PT                                 | <i>Pyrococcus horikoshii</i> OT3                    |
| <i>Candidatus Methanoregula boonei</i> 6A8       | <i>Methanosarcina mazei</i> GoI                                   | <i>Staphylothermus marinus</i> F1                   |
| <i>Ferroplasma acidarmanus</i> fer1              | <i>Methanospaera stadmanae</i> DSM 3091                           | <i>Sulfolobus acidocaldarius</i> DSM 639            |
| <i>Haloarcula marismortui</i> ATCC 43049         | <i>Methanothermobacter thermautotrophicus</i> str. <i>Delta H</i> | <i>Sulfolobus solfataricus</i> P2                   |
| <i>Halobacterium</i> sp. NRC-1                   | <i>Nanoarchaeum equitans</i> Kin4-M                               | <i>Sulfolobus tokodaii</i> str. 7                   |
| <i>Halorubrum lacusprofundi</i> ATCC 49239       | <i>Natronomonas pharaonis</i> DSM 2160                            | <i>Thermococcus kodakarensis</i> KOD1               |
| <i>Hyperthermus butylicus</i> DSM 5456           | <i>Picrophilus torridus</i> DSM 9790                              | <i>Thermofilum pendens</i> Hrk 5                    |
| <i>Ignicoccus hospitalis</i> KIN4/I              | <i>Pyrobaculum aerophilum</i> str. IM2                            | <i>Thermoplasma acidophilum</i> DSM 1728            |
| <i>Metallosphaera sedula</i> DSM 5348            | <i>Pyrobaculum arsenaticum</i> DSM 13514                          | <i>Thermoplasma volcanium</i> GSS1                  |
| <b>Actinobacteria</b>                            | <b>NAB-1</b>                                                      | <b>NAB-2</b>                                        |
| <i>Brevibacterium linens</i> BL2                 | ZP_00379860                                                       | ZP_00379861                                         |
| <i>Mycobacterium gilvum</i> PYR-GCK              |                                                                   | YP_001136025                                        |
| <i>Streptomyces avermitilis</i> MA-4680          | NP_824551                                                         | NP_824550                                           |
| <i>Streptomyces coelicolor</i> A3(2)]            | NP_629034                                                         | NP_629033                                           |
| <i>Thermobifida fusca</i> YX                     | YP_288072                                                         | YP_288073                                           |
| <i>Acidothermus cellulolyticus</i> 11B           | Frankia sp. CcI3                                                  | <i>Mycobacterium tuberculosis</i> CDC1551           |
| <i>Actinomyces odontolyticus</i> ATCC 17982      | Frankia sp. EAN1pec                                               | <i>Mycobacterium tuberculosis</i> F11               |
| <i>Arthrobacter aurescens</i> TC1                | Janibacter sp. HTCC2649                                           | <i>Mycobacterium tuberculosis</i> H37Ra             |
| <i>Arthrobacter</i> sp. FB24                     | Kineococcus radiotolerans SRS30216                                | <i>Mycobacterium tuberculosis</i> H37Rv             |
| <i>Bifidobacterium adolescentis</i> ATCC 15703   | Leifsonia xyli subsp. xyli str. CTCB07                            | <i>Mycobacterium tuberculosis</i> str. Haarlem      |
| <i>Bifidobacterium adolescentis</i> L2-32        | marine actinobacterium PHSC20C1                                   | <i>Mycobacterium ulcerans</i> Agy99                 |
| <i>Bifidobacterium longum</i> DJO10A             | <i>Mycobacterium avium</i> 104                                    | <i>Mycobacterium vanbaalenii</i> PYR-1              |
| <i>Bifidobacterium longum</i> NCC2705            | <i>Mycobacterium avium</i> subsp. <i>paratuberculosis</i> K-10    | <i>Nocardia farcinica</i> IFM 10152                 |

|                                                                                     |                                                    |                                              |                       |
|-------------------------------------------------------------------------------------|----------------------------------------------------|----------------------------------------------|-----------------------|
| <i>Clavibacter michiganensis</i> subsp. <i>michiganensis</i> NCPPB 382              | <i>Mycobacterium bovis</i> AF2122/97               | <i>Nocardioides</i> sp. JS614                |                       |
| <i>Collinsella aerofaciens</i> ATCC 25986                                           | <i>Mycobacterium bovis</i> BCG str. Pasteur 1173P2 | <i>Propionibacterium acnes</i> KPA171202     |                       |
| <i>Corynebacterium diphtheriae</i> NCTC 13129                                       | <i>Mycobacterium leprae</i> TN                     | <i>Rhodococcus</i> sp. RHA1                  |                       |
| <i>Corynebacterium efficiens</i> YS-314                                             | <i>Mycobacterium smegmatis</i> str. MC2 155        | <i>Rubrobacter xylanophilus</i> DSM 9941     |                       |
| <i>Corynebacterium glutamicum</i> ATCC 13032                                        | <i>Mycobacterium</i> sp. JLS                       | <i>Saccharopolyspora erythraea</i> NRRL 2338 |                       |
| <i>Corynebacterium glutamicum</i> R                                                 | <i>Mycobacterium</i> sp. KMS                       | <i>Salinispora arenicola</i> CNS-205         |                       |
| <i>Corynebacterium jeikeium</i> K411                                                | <i>Mycobacterium</i> sp. MCS                       | <i>Salinispora tropica</i> CNB-440           |                       |
| <i>Frankia alni</i> ACN14a                                                          | <i>Mycobacterium tuberculosis</i> C                | <i>Tropheryma whipplei</i> str. Twist        |                       |
|                                                                                     |                                                    | <i>Tropheryma whipplei</i> TW08/27           |                       |
| <b>Spirochetales</b>                                                                | <b>NAB-1</b>                                       | <b>NAB-2</b>                                 |                       |
| <i>Leptospira borgpetersenii</i> serovar <i>Hardjobovis</i> JB197                   | YP_800486                                          | YP_800485                                    | YP_800448             |
| <i>Leptospira borgpetersenii</i> serovar <i>Hardjobovis</i> L550                    | YP_797605                                          | YP_797604                                    | YP_797566             |
| <i>Leptospira interrogans</i> serovar <i>Copenhageni</i> str. <i>Fiocruz LI-130</i> | YP_002112                                          | YP_002102                                    | YP_002108<br>no ptase |
| <i>Leptospira interrogans</i> serovar <i>Lai</i> str. 56601                         | NP_711786                                          | NP_711796                                    | NP_711790             |
| <i>Treponema denticola</i> ATCC 35405                                               |                                                    | NP_971570                                    |                       |
| <i>Treponema pallidum</i> subsp. <i>pallidum</i> str. <i>Nichols</i>                | NP_218729                                          | NP_219001                                    |                       |
| <i>Borrelia afzelii</i> ACA-1                                                       | <i>Borrelia burgdorferi</i> B31                    | <i>Borrelia garinii</i> PBI                  |                       |
| <i>Borrelia afzelii</i> PKo                                                         | <i>Borrelia burgdorferi</i> Bol26                  | <i>Borrelia valaisiana</i> VS116             |                       |
| <i>Borrelia burgdorferi</i> 156a                                                    | <i>Borrelia burgdorferi</i> ZS7                    |                                              |                       |
